# Supplementary material for: A mixed-valent vanadium oxide cathode with ultrahigh rate capability for aqueous zinc-ion batteries
Source: Royal Society of Chemistry journal article supplement (doi:10.1039/d1ta04420f), 2021-01-01
Supplement: d1ta04420f1.pdf [file d1ta04420f1.pdf]

Supporting Information

## Mixed-Valent Vanadium oxide Cathode with Ultrahigh Rate Capability for Aqueous Zinc-Ion Battery

Shenglong Li,<sup>a</sup> Xiujuan Wei,<sup>\*a</sup> Haopeng Chen,<sup>a</sup> Guoyong Lai,<sup>a</sup> Xuanpeng Wang,<sup>ab</sup> Shaojian Zhang,<sup>a</sup>  
Shuxing Wu,<sup>a</sup> Weiting Tang<sup>a</sup> and Zhan Lin <sup>\*a</sup>

<sup>a</sup>Guangzhou Key Laboratory of Clean Transportation Energy Chemistry, School of Chemical Engineering and Light Industry, Guangdong University of Technology, Guangzhou 510006, China.

<sup>b</sup>Department of Physical Science & Technology, School of Science, Wuhan University of Technology, Wuhan 430070, P. R. China

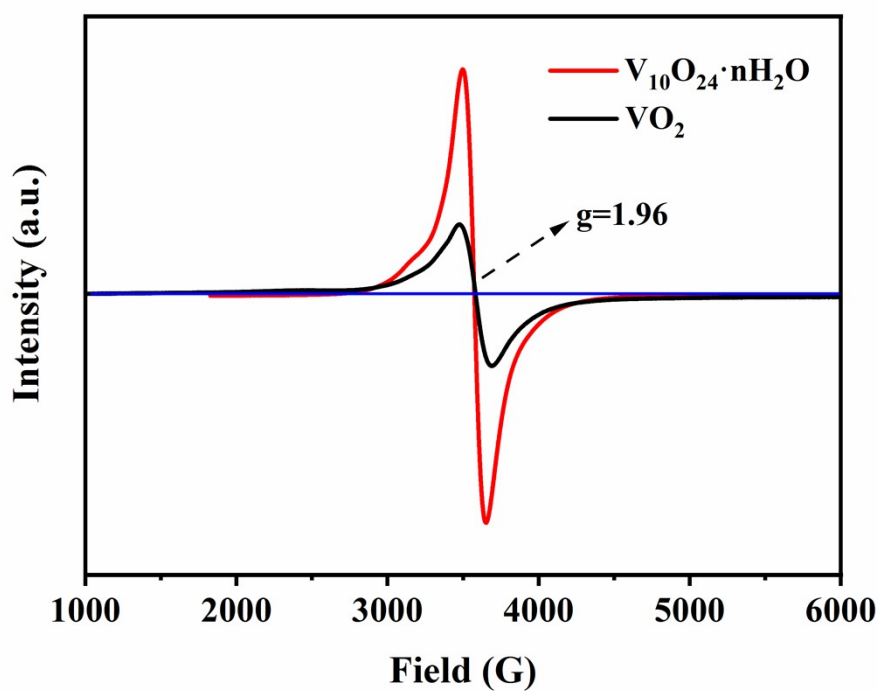

**Figure S1.** EPR spectra of  $V_{10}O_{24} \cdot nH_2O$  and  $VO_2$  with the giso-factor 1.96.

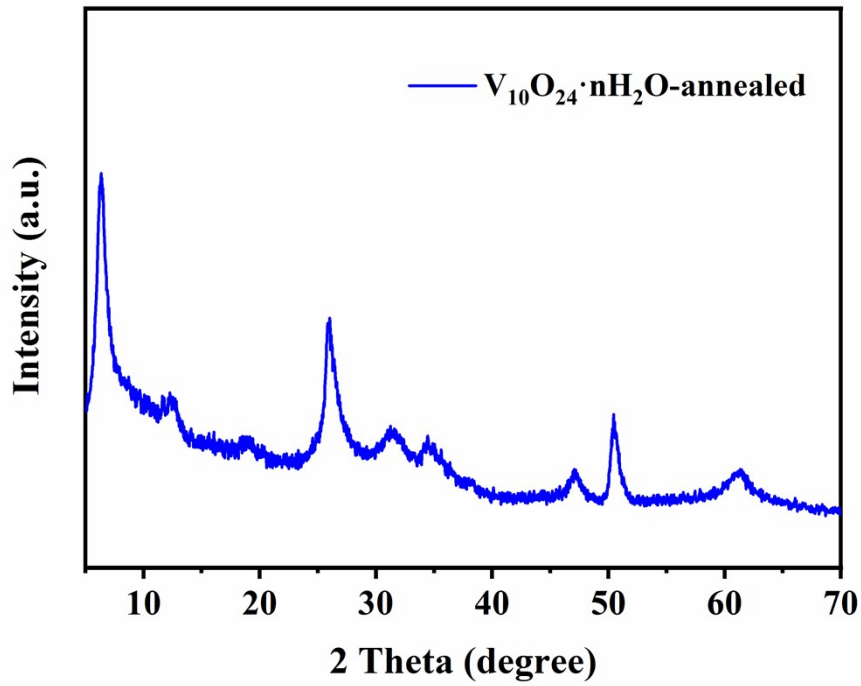

Figure S2. The XRD pattern of  $V_{10}O_{24} \cdot nH_2O$ -annealed composite.

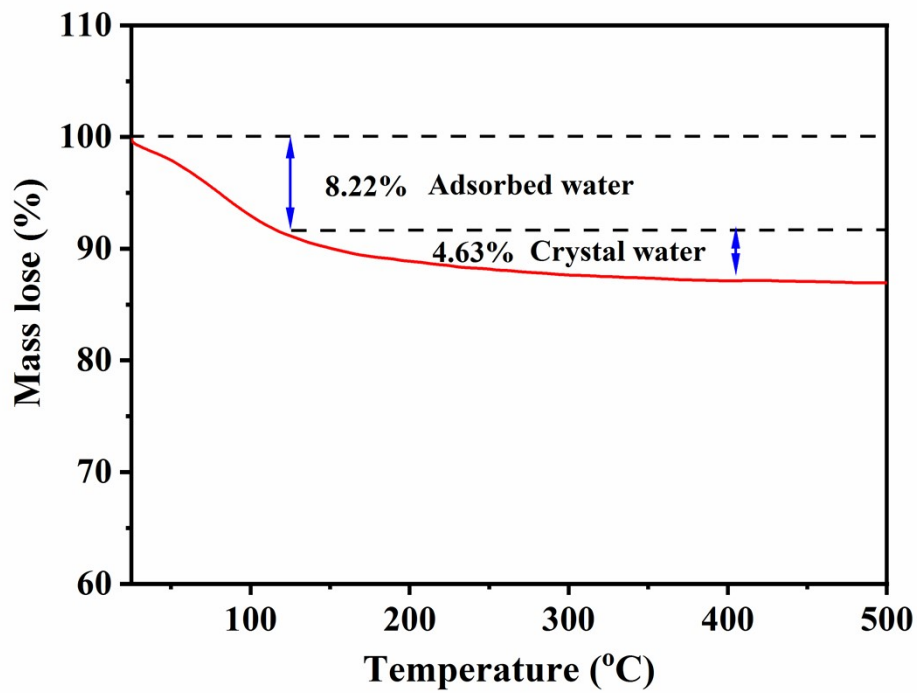

Figure S3. The TG curve of  $V_{10}O_{24} \cdot nH_2O$ -annealed composite.

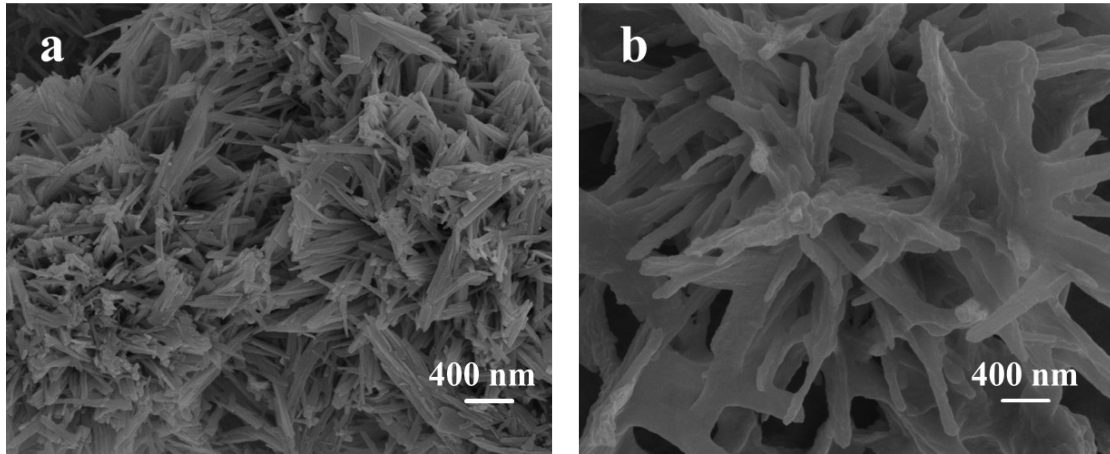

Figure S4. SEM images of (a) as-prepared VO<sub>2</sub> and (b) V<sub>10</sub>O<sub>24</sub>·nH<sub>2</sub>O-annealed.

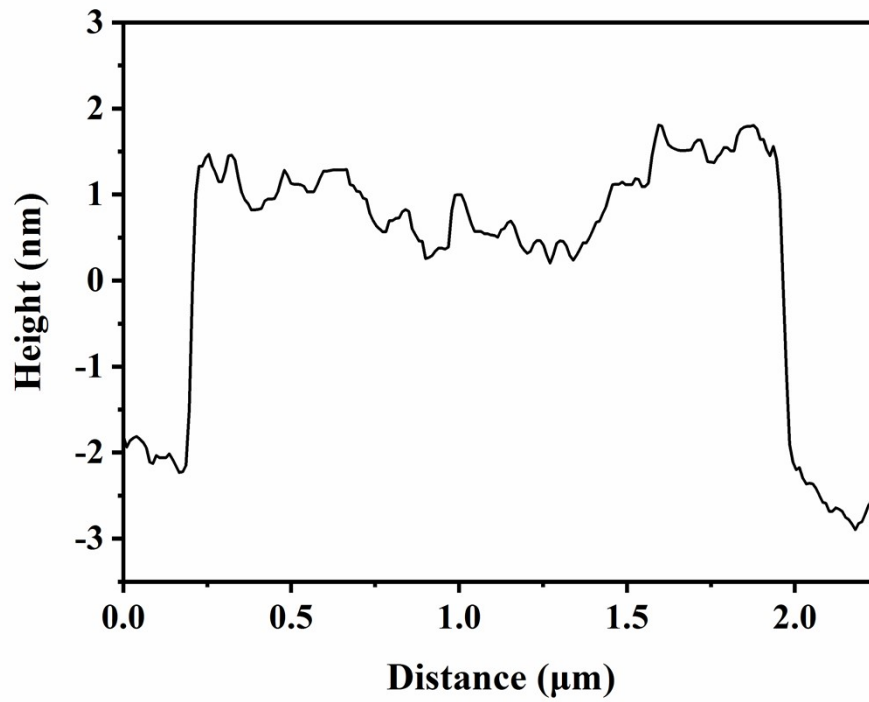

Figure S5. The corresponding height profiles of individual nanoribbons taken along the red line in Figure 2e.

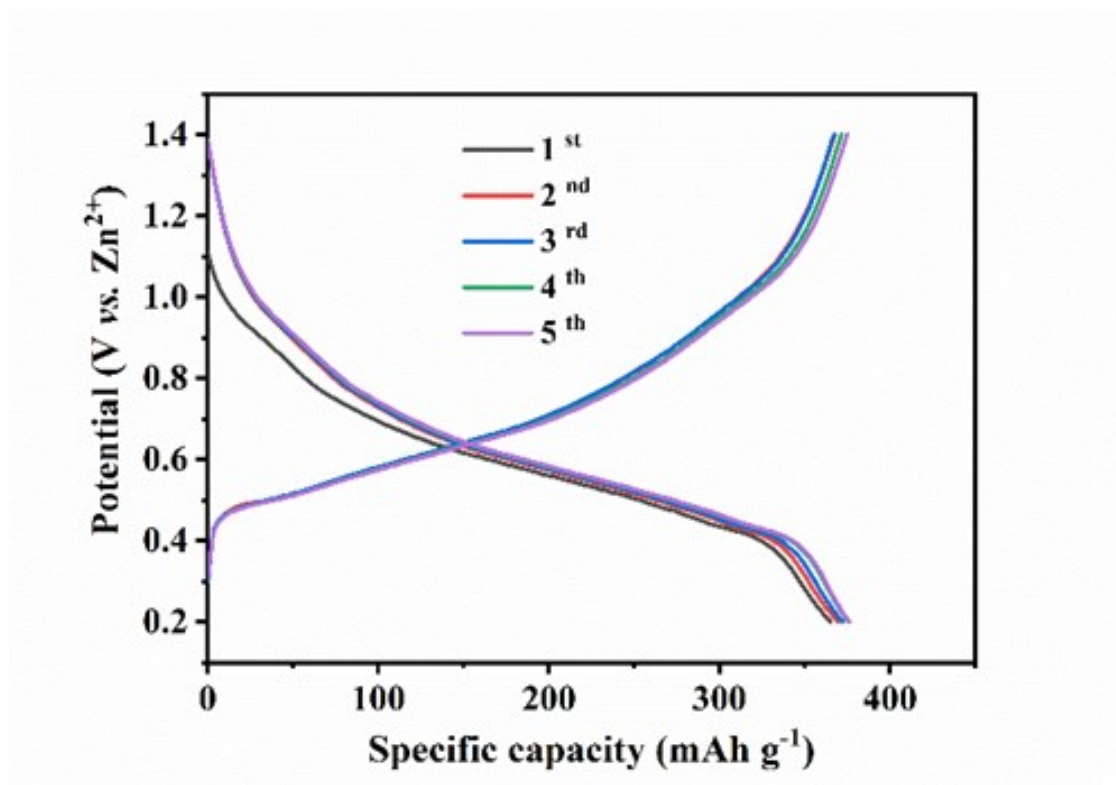

**Figure S6.** Charge-discharge profiles for the  $V_{10}O_{24} \cdot nH_2O$  electrode at different cycles at  $0.2 \text{ A g}^{-1}$ .

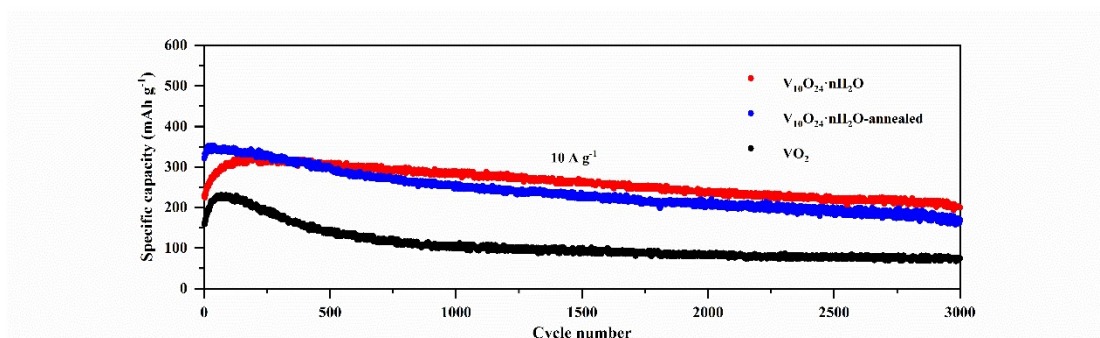

**Figure S7.** Long cycling performance of  $V_{10}O_{24} \cdot nH_2O$ ,  $V_{10}O_{24} \cdot nH_2O$ -annealed and  $VO_2$  at  $10 \text{ A g}^{-1}$  for 3000 cycles.

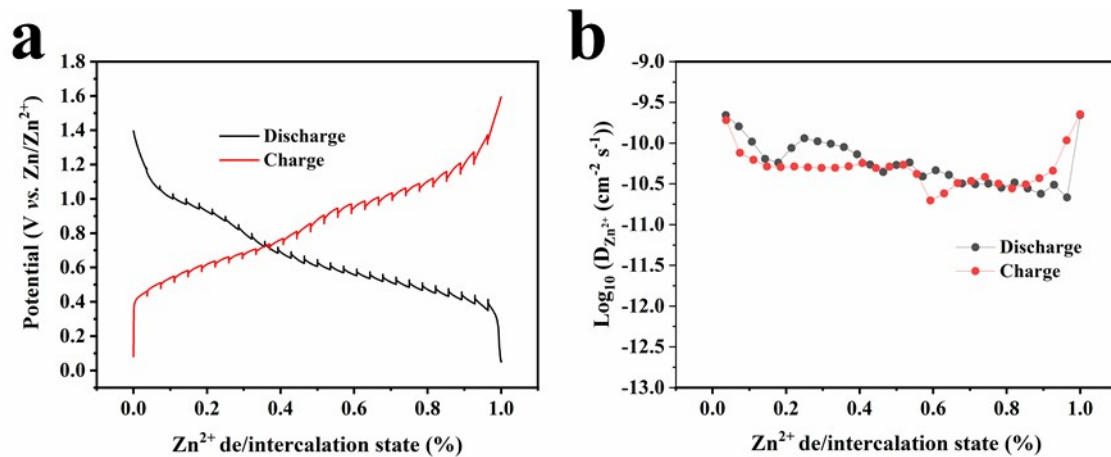

**Figure S8.** (a) Charge–discharge GITT curves at a current density of  $0.1 \text{ A g}^{-1}$ . (b) the corresponding  $Zn^{2+}$  diffusion coefficient of  $V_{10}O_{24} \cdot nH_2O$ -annealed electrode.
